# Supplementary material for: Facile synthesis of reduced graphene oxide wrapped nickel silicate hierarchical hollow spheres for long-life lithium-ion batteries
Source: Royal Society of Chemistry journal article supplement (doi:10.1039/c5ta04680g), 2015-01-01
Supplement: c5ta04680g1.pdf [file c5ta04680g1.pdf]

## Electronic Supplementary Information

### Facile Synthesis of Reduced Graphene Oxide Wrapped Nickel Silicate Hierarchical Hollow Spheres for Long-life Lithium-ion Battery

Chunjuan Tang,<sup>‡a,b</sup> Jinzhi Sheng,<sup>‡a</sup> Chang Xu,<sup>a</sup> S.M.B. Khajehbashi,<sup>a</sup> Xuanpeng Wang,<sup>a</sup> Ping Hu,<sup>a</sup> Xiujuan Wei,<sup>a</sup> Qiulong Wei,<sup>a</sup> Liang Zhou<sup>a</sup> and Liqiang Mai<sup>\*a</sup>

a. State Key Laboratory of Advanced Technology for Materials Synthesis and Processing, Wuhan University of Technology, Wuhan 430070, Hubei, China. E-mail: mlq518@whut.edu.cn

b. Department of mathematics and Physics, Luoyang institute of science and technology, Luoyang 471023, PR China

**Table S1.** CHNS analysis of the NiSiO / RGO composite.

| Sample    | N(%) | C(%) | H(%) | S(%) |
|-----------|------|------|------|------|
| NiSiO/RGO | 0.67 | 6.52 | 1.5  | 0.01 |

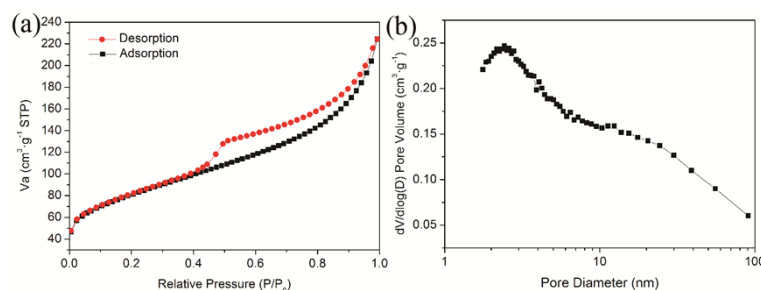

**Figure S1.** (a) Nitrogen adsorption-desorption isotherm and (b) the corresponding pore size distribution of NiSiO hollow spheres.

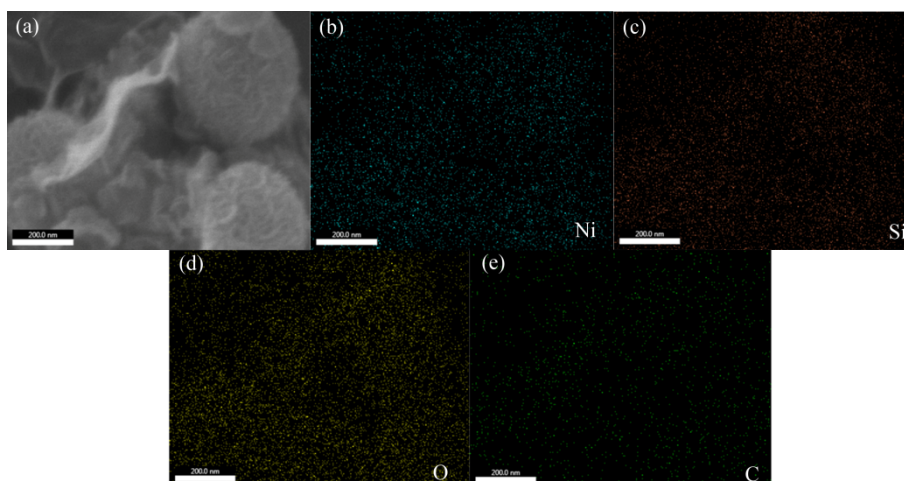

**Figure S2.** The element mapping results of NiSiO/RGO

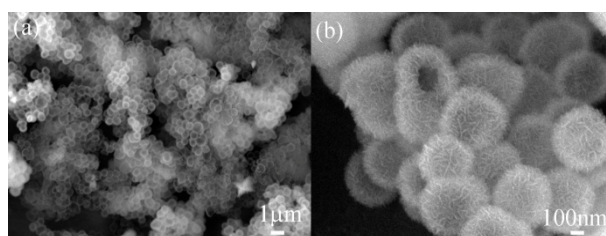

**Figure S3.** (a) Low- and (b) high-magnification SEM images of NiSiO hollow spheres.

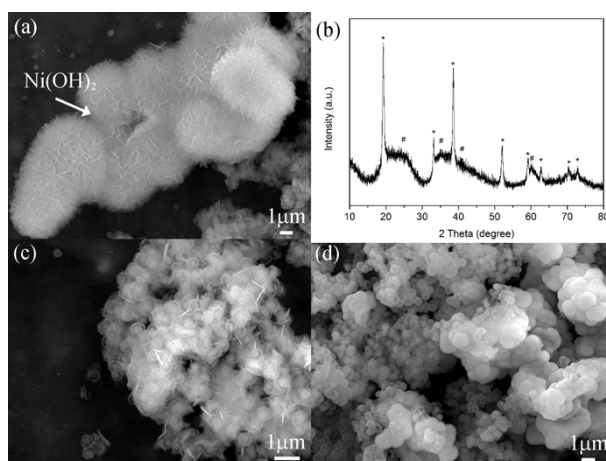

**Figure S4.** (a) SEM image and (b) XRD pattern of the products without the addition of  $\text{NH}_4\text{Cl}$ ; (c) SEM image of the product with the addition of 1 mL  $\text{NH}_3 \cdot \text{H}_2\text{O}$ ; (d) SEM image of the product with the addition of 3 mL  $\text{NH}_3 \cdot \text{H}_2\text{O}$ .

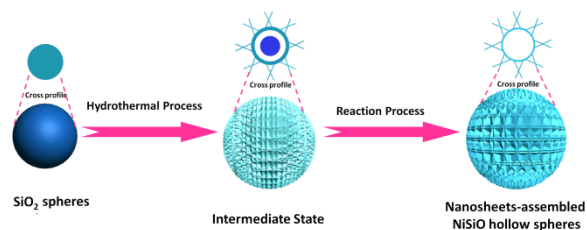

**Figure S5.** Schematic illustration for the fabrication of NiSiO hollow spheres.

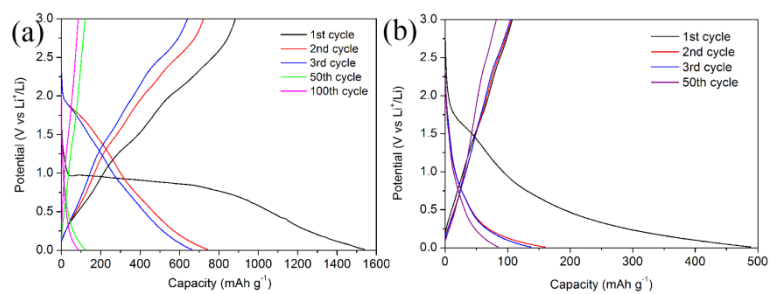

**Figure S6.** Discharge/charge curves of (a) NiSiO hollow spheres and (b) RGO.

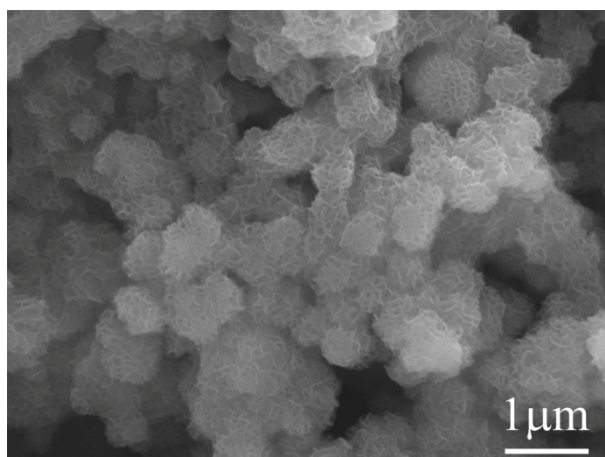

**Figure S7.** SEM image of pure NiSiO hollow spheres after 50 cycles
